# Supplementary material for: A Fork Trap in the Chromosomal Termination Area Is Highly Conserved across All Escherichia coli Phylogenetic Groups
Source: MDPI journal article supplement (doi:10.3390/ijms22157928), 2021-07-25
Supplement: s1 [file s1]

# Supplementary Material

*A fork trap in the chromosomal termination area  
is highly conserved across all Escherichia coli phylogenetic  
groups*

Daniel J. Goodall<sup>1</sup>, Katie H. Jameson<sup>2</sup>, Michelle Hawkins<sup>2</sup> and Christian J. Rudolph<sup>1,\*</sup>

\*Corresponding author: christian.rudolph@brunel.ac.uk

<sup>1</sup> Division of Biosciences, College of Health, Medicine and Life Sciences,  
Brunel University London, Uxbridge, UB8 3PH, UK

<sup>2</sup> Department of Biology, University of York,  
Wentworth Way, York, YO10 5DD, UK

## **SUPPLEMENTARY FIGURES AND LEGENDS**

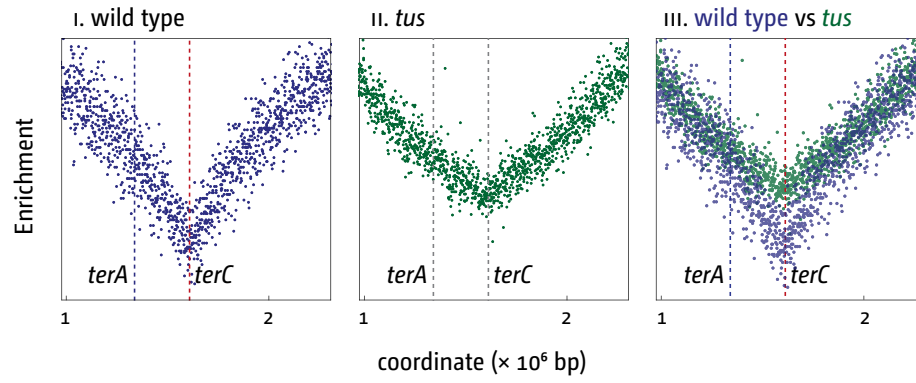

**Figure S1.** Replication termination in *E. coli* cells in the presence and absence of a functional replication fork trap. Shown is the marker frequency analysis of the fork fusion area of *E. coli* cells in which the replication fork trap in the termination area was inactivated by deletion of the *tus* gene. The number of reads (normalised against reads for a stationary phase wild type control) is plotted against the chromosomal location. The innermost *ter* sites *A* and *C* are shown by dotted lines. Individual profiles of MG1655 (blue) and  $\Delta tus$  (green) are shown in panels i and ii, while an overlay of both is shown in panel iii. The data were re-plotted from [2].

## Phylogroup A

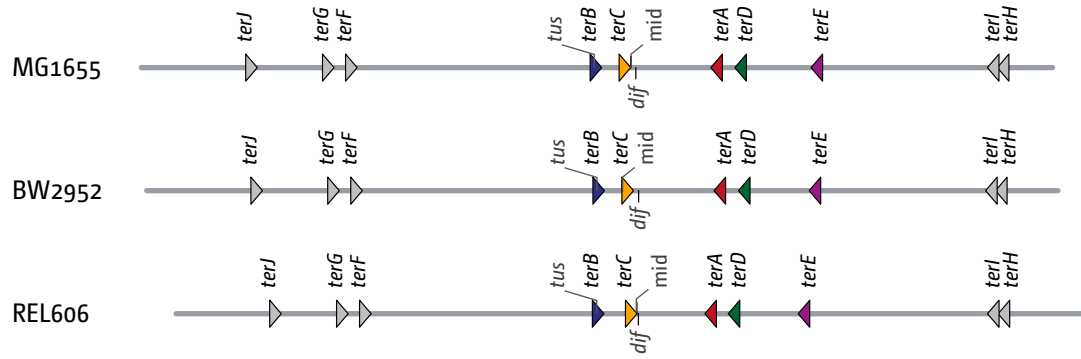

**Figure S2.** Architecture of the replication fork trap in genomes from groups of *E. coli* genomes representing the phylogenetic groups A, B1, B2, D and E. Orientation of the *ter* sites is indicated by triangle orientation. Forks meeting the tip of the triangle first will be blocked. If single nucleotide changes occur in comparison to the MG1655 reference genome, the number of changes is shown in superscript. The strand location of *dif* is indicated by the direction of the marker. The marker pointing downwards indicates that the *dif* sequence as defined in [4] is on the (-) strand.

## Phylogroup B1

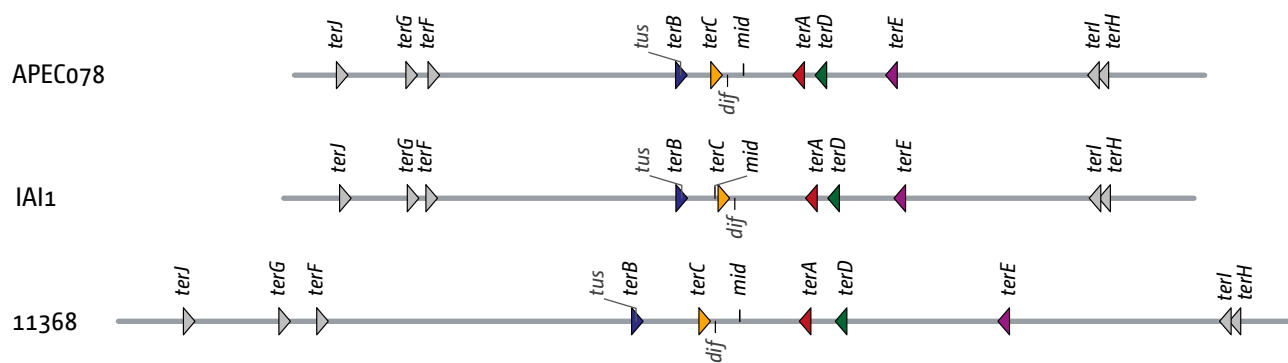

Figure S2 continued.

## Phylogroup B2

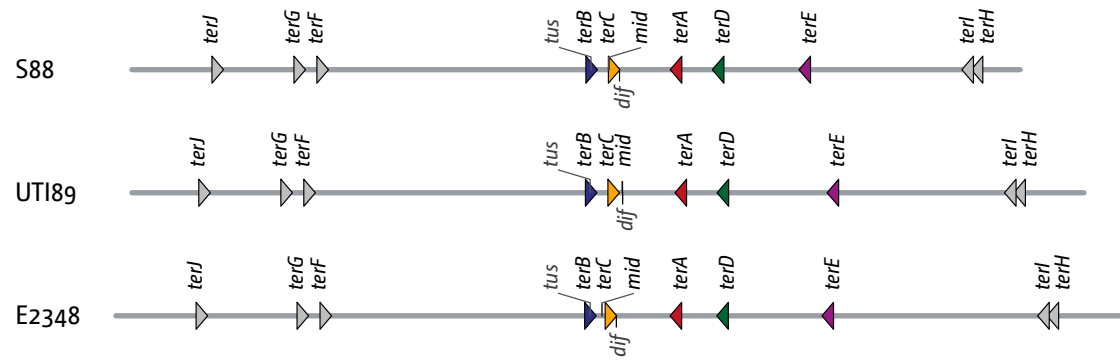

Figure S2 continued.

## Phylogroup D

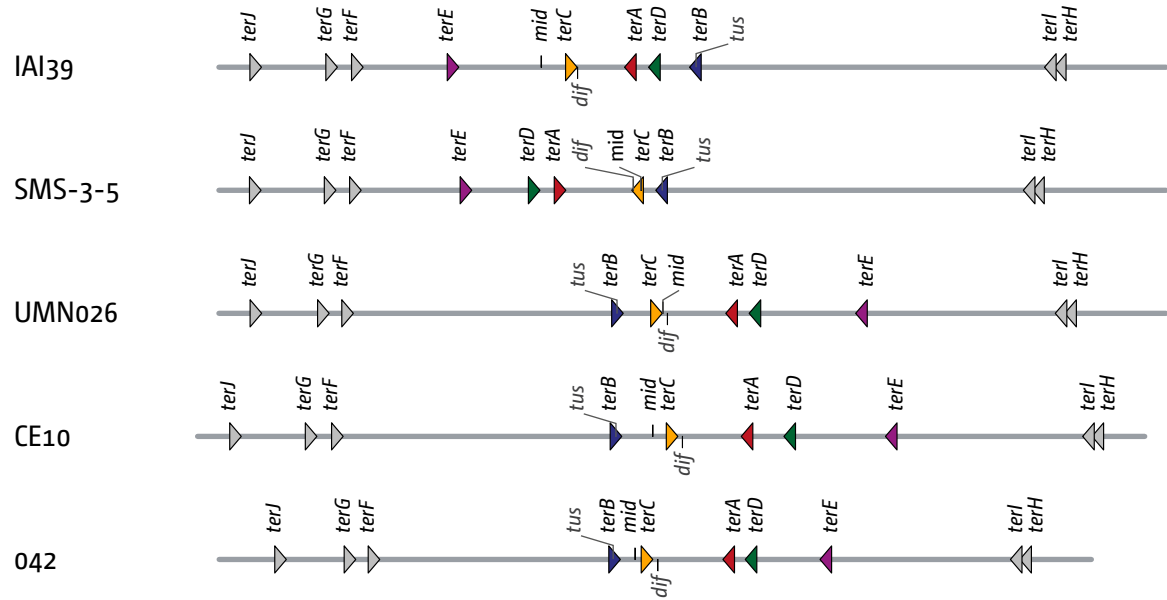

Figure S2 continued.

# Phylogroup E

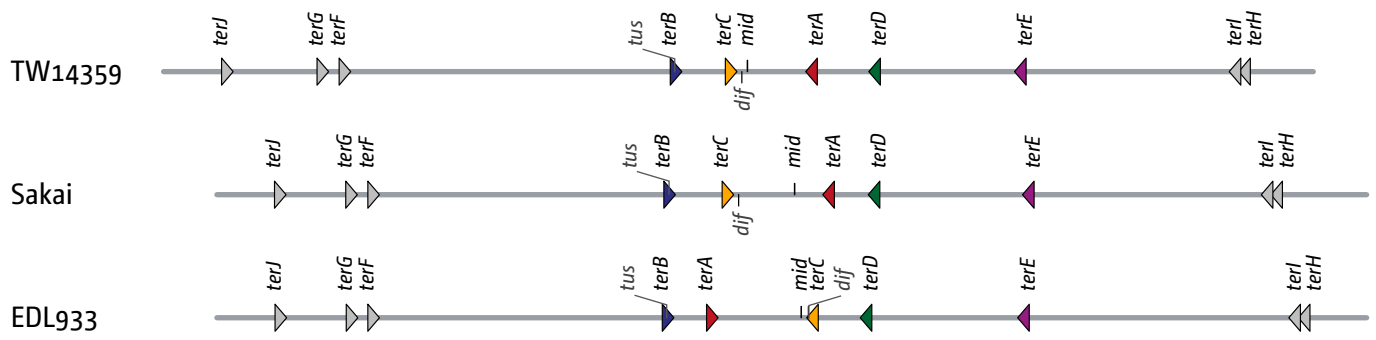

Figure S2 continued.



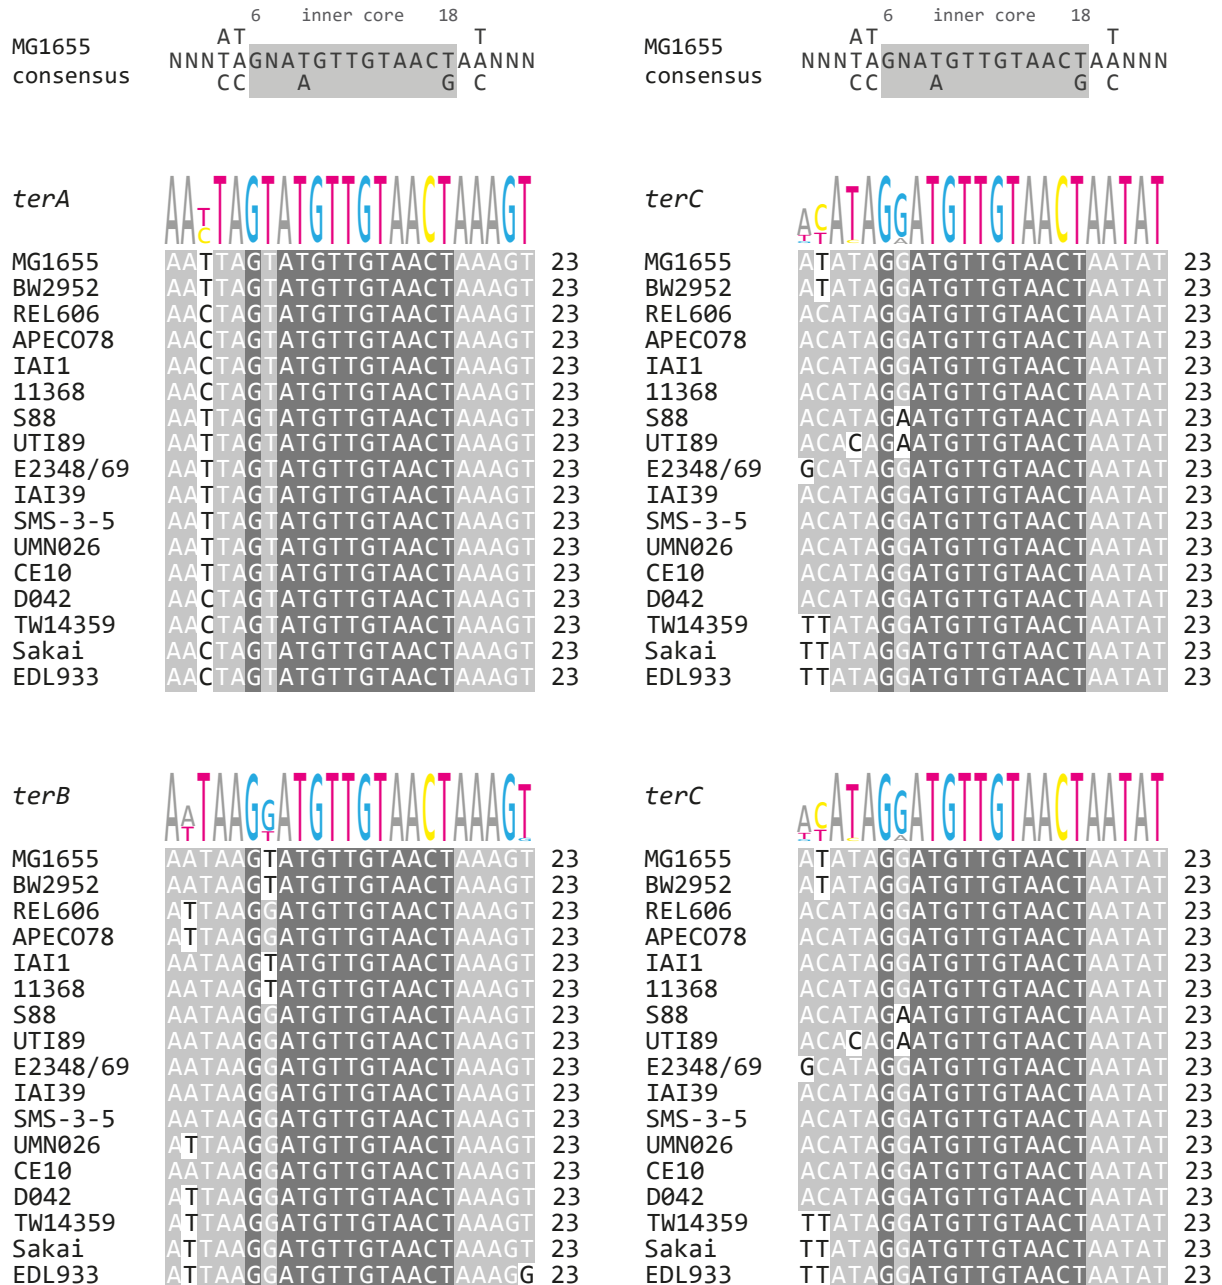

**Figure S3.** Sequence comparison of all *ter* sites across all phylogenetic groups from all *E. coli* genomes analysed, with the MG1655 sequences as reference. The consensus sequence of all *ter* sites in MG1655 is shown at the top. Base pairs 1 – 5, 7 and 19 – 23 show a high degree of variability and are shaded in a lighter grey. The highly conserved positions 6 and 8 – 18 are highlighted by a darker grey. Mismatches unlikely to interfere significantly with binding have a white background shading. Mismatches within the core conserved sequence that are likely to interfere with binding are highlighted in red. Relative nucleotide frequencies are shown above as scaled letters.

MG1655  
consensus

AT 6 inner core 18 T  
NNNTAGNATGTTGTAAC TAANN  
CC A G C

MG1655  
consensus

AT 6 inner core 18 T  
NNNTAGNATGTTGTAAC TAANN  
CC A G C

*terE*

TTAAAGTATGTTGTAAC TAAGCA 23  
MG1655  
BW2952  
REL606  
APEC078  
IAI1  
11368  
S88  
UTI89  
E2348/69  
IAI39  
SMS-3-5  
UMN026  
CE10  
D042  
TW14359  
Sakai  
EDL933

*terG*

GTCAAGGATGTTGTAAC TAACCA 23  
MG1655  
BW2952  
REL606  
APEC078  
IAI1  
11368  
S88  
UTI89  
E2348/69  
IAI39  
SMS-3-5  
UMN026  
CE10  
D042  
TW14359  
Sakai  
EDL933

*terF*

CCTTCGTATGTTGTACGACGAT 23  
MG1655  
BW2952  
REL606  
APEC078  
IAI1  
11368  
S88  
UTI89  
E2348/69  
IAI39  
SMS-3-5  
UMN026  
CE10  
D042  
TW14359  
Sakai  
EDL933

*terH*

CGATCGTATGTTGTAAC TATCTC 23  
MG1655  
BW2952  
REL606  
APEC078  
IAI1  
11368  
S88  
UTI89  
E2348/69  
IAI39  
SMS-3-5  
UMN026  
CE10  
D042  
TW14359  
Sakai  
EDL933

Figure S3 continued.

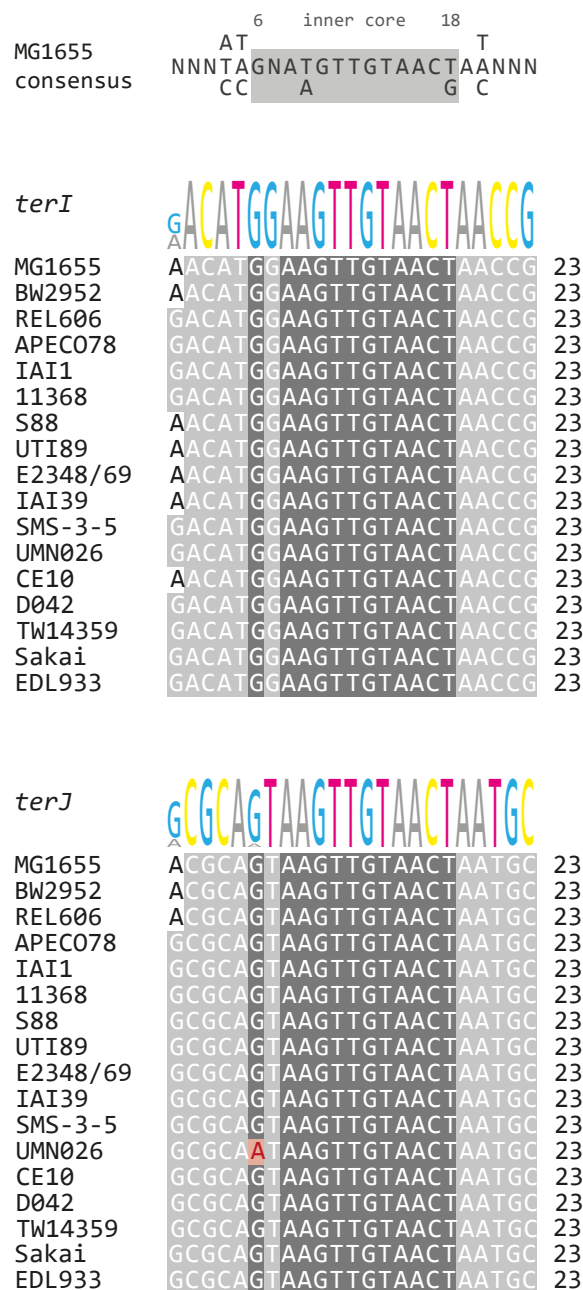

Figure S3 continued.

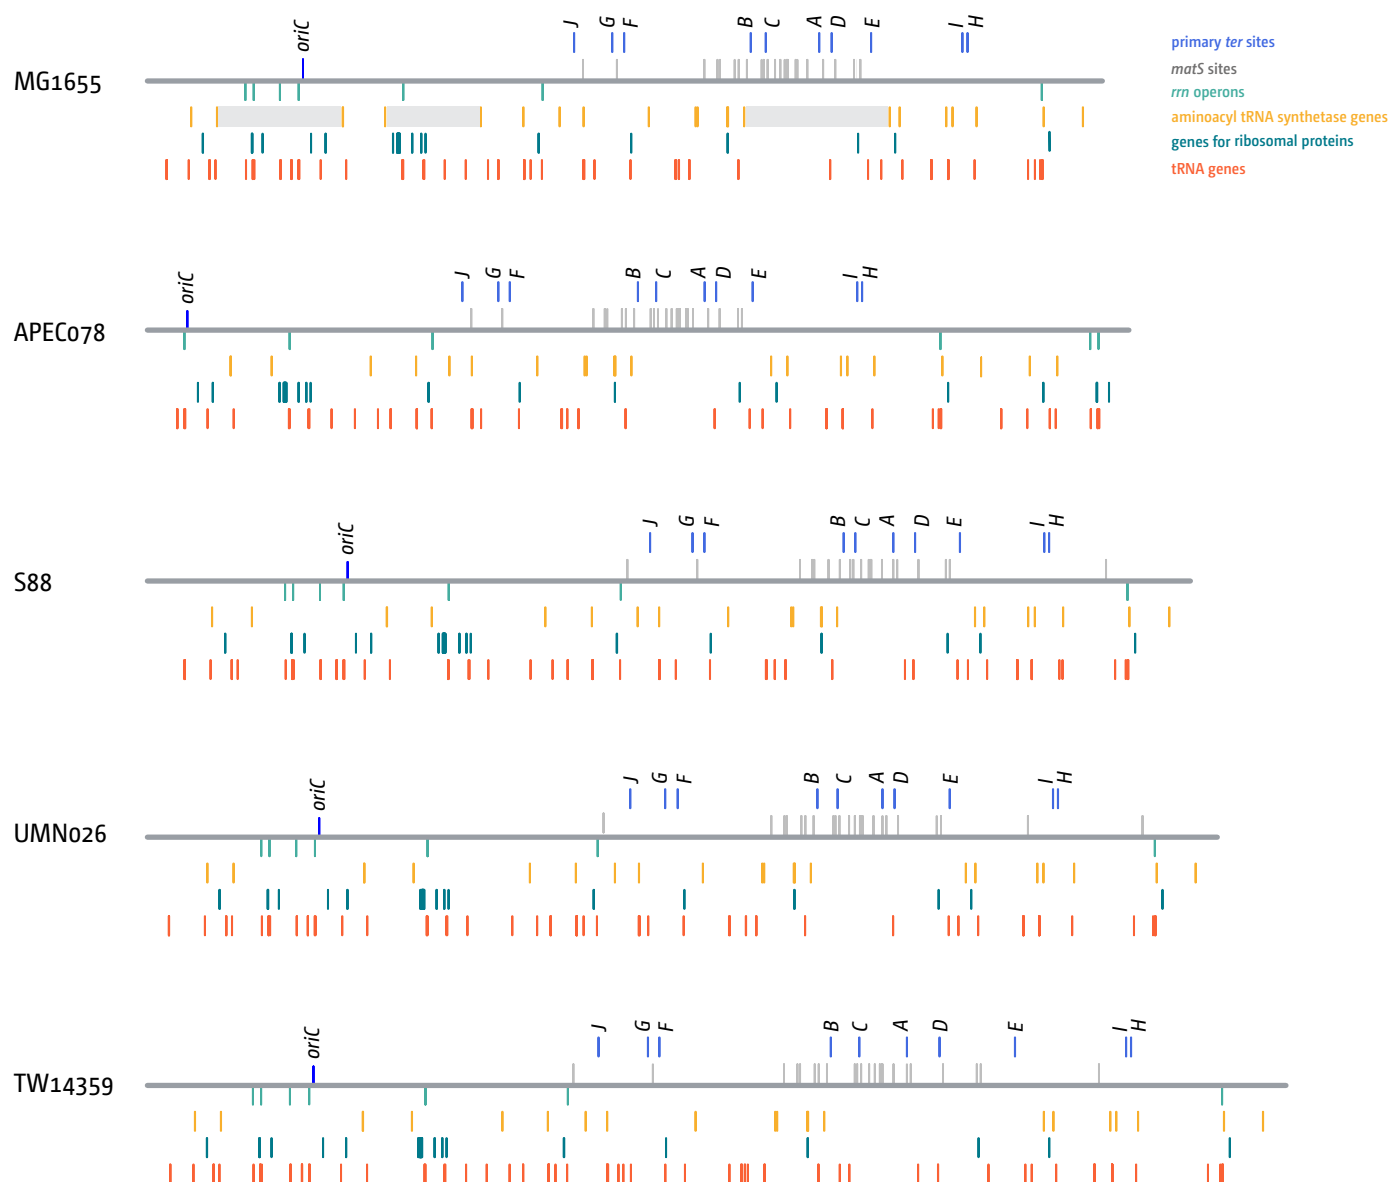

**Figure S4.** Location and distribution of genes and genetic markers involved in termination of DNA replication as well as translation. Above the line representing the chromosome the origin is shown, together with all primary *ter* sites (blue) and all *matS* sites (grey), which, if bound by MatP, define the chromosomal Ter domain. Below are shown the *rrn* operons (green), genes coding for aminoacyl tRNA synthetases (yellow), genes encoding ribosomal proteins (cyan) and tRNA genes (orange). Significant gaps in the distributions of aminoacyl tRNA synthetase genes are shown via a grey background for MG1655 (see main text for details).

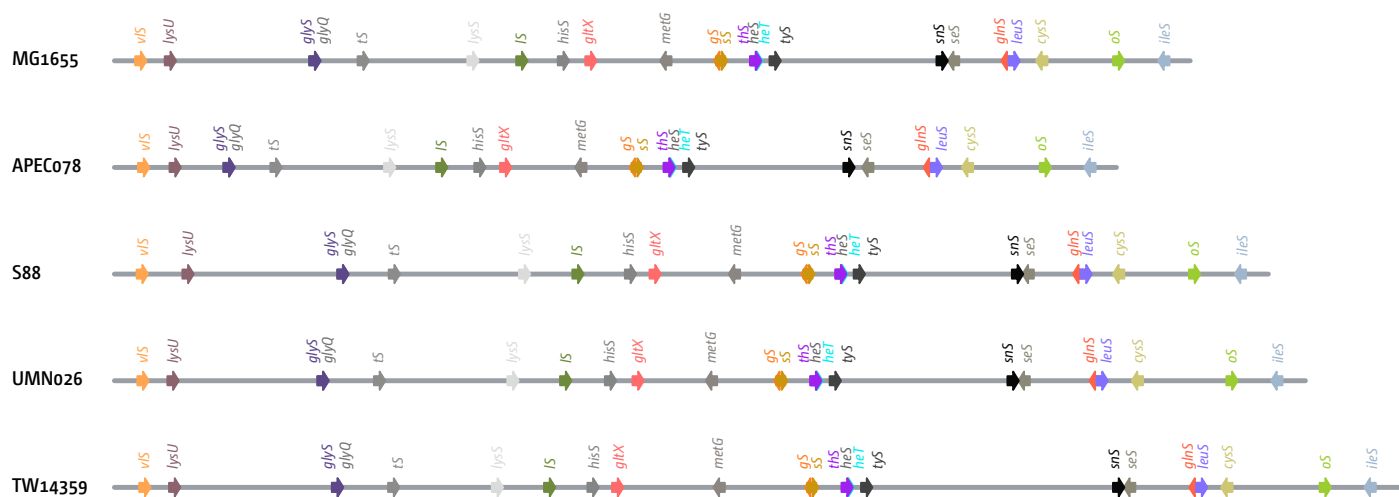

**Figure S5.** Location and relative order of aminoacyl tRNA synthetase genes within the chromosomes of the *E. coli* phylogroups A (MG1655), B1 (APEC078), B2 (S88), D (UMN026) and E (TW14359). Every gene within a certain genome has a specific colour, which highlights similarities in position across all genomes. Gene names are given above. Transcriptional directionality of the genes is highlighted by an arrow.

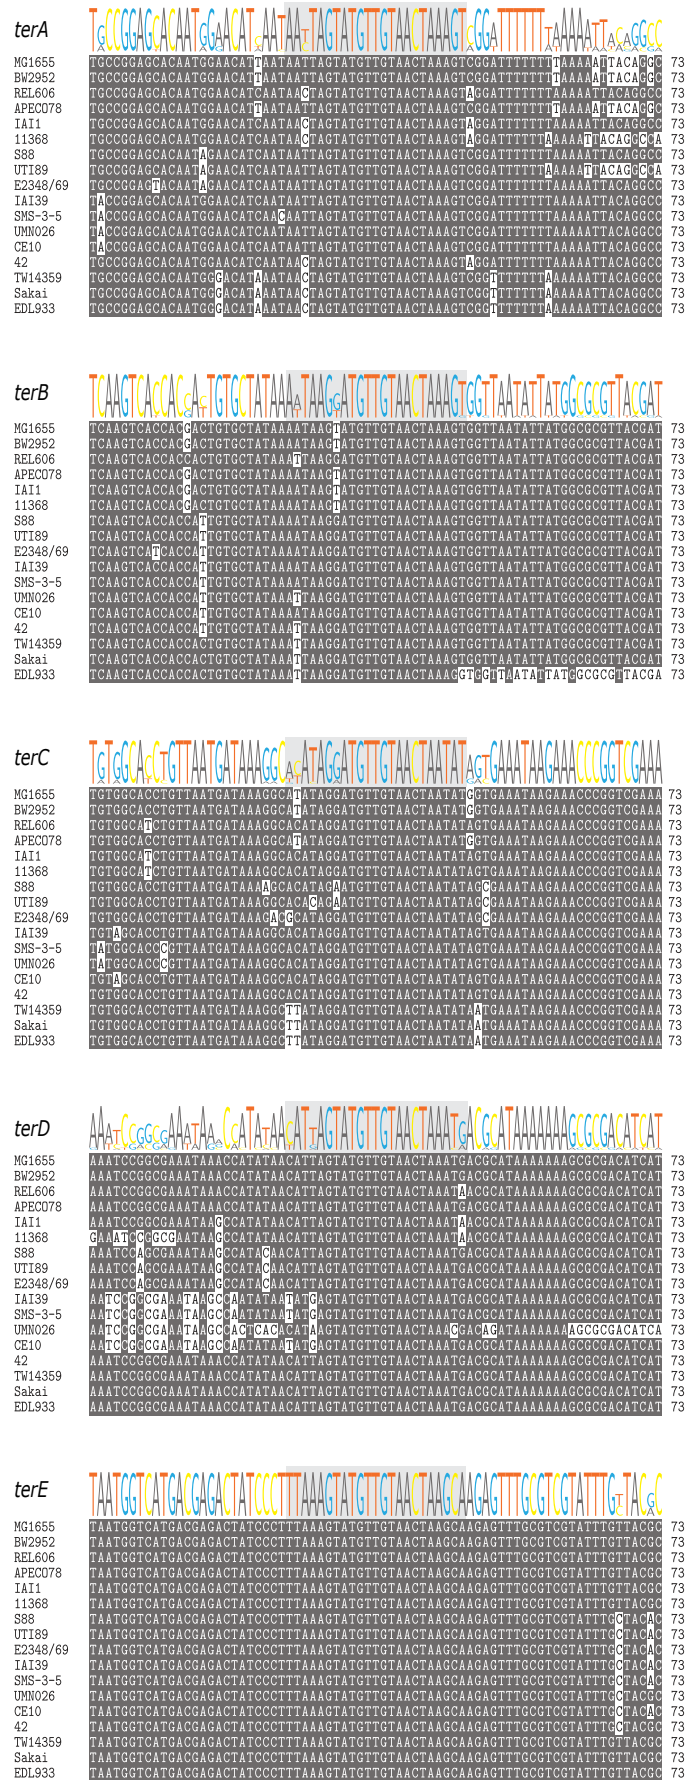

**Figure S6.** Sequence comparison of all *ter* sites, including 25 bp upstream as well as downstream, across all phylogenetic groups from all *E. coli* genomes analysed, with the MG1655 sequences as reference. The *ter* sequence is highlighted by a light grey box in the nucleotide frequencies at the top of each comparison. All conserved positions are highlighted by a darker grey, while mismatches are shown as a black letter on a white background. Relative nucleotide frequencies are shown above as scaled letters.

*terF*

MG1655  
BW2952  
REL606  
APE0078  
IAI1  
11368  
S88  
UT189  
E2348/69  
IAI39  
SMS-3-5  
UMN026  
CE10  
42  
TW14359  
Sakai  
EDL933

CACATCTTCGGGAGTCGGTCTCGCCCTTCGTATGTTGTAACGACGATGCCGTCGGCTGCAAACTGGTTTC

73  
73  
73  
73  
73  
73  
73  
73  
73  
73  
73  
73  
73  
73  
73  
73  
73  
73

*terG*

MG1655  
BW2952  
REL606  
APE0078  
IAI1  
11368  
S88  
UT189  
E2348/69  
IAI39  
SMS-3-5  
UMN026  
CE10  
42  
TW14359  
Sakai  
EDL933

CAAGCGAGTACCCACACCCAGAAGTAAAGATGTTGTAACCAAGGTTTACGCGAGTAAGTCGGTGAC

73  
73  
73  
73  
73  
73  
73  
73  
73  
73  
73  
73  
73  
73  
73  
73  
73  
73

*terH*

MG1655  
BW2952  
REL606  
APE0078  
IAI1  
11368  
S88  
UT189  
E2348/69  
IAI39  
SMS-3-5  
UMN026  
CE10  
42  
TW14359  
Sakai  
EDL933

GATGGCGGGTCAATGAGCTGGCTGCGATCGTATGTTGTAACATCTCCACGGCTTCGGGACAGCTCTTTTC

73  
73  
73  
73  
73  
73  
73  
73  
73  
73  
73  
73  
73  
73  
73  
73  
73  
73

*terI*

MG1655  
BW2952  
REL606  
APE0078  
IAI1  
11368  
S88  
UT189  
E2348/69  
IAI39  
SMS-3-5  
UMN026  
CE10  
42  
TW14359  
Sakai  
EDL933

GCAGACGCCACCATCAGCCAGCGGACATGGAAGTTGTAACCAACCGGTTTGCGCAATCAACCGTTCCAG

73  
73  
73  
73  
73  
73  
73  
73  
73  
73  
73  
73  
73  
73  
73  
73  
73  
73

*terJ*

MG1655  
BW2952  
REL606  
APE0078  
IAI1  
11368  
S88  
UT189  
E2348/69  
IAI39  
SMS-3-5  
UMN026  
CE10  
42  
TW14359  
Sakai  
EDL933

CAGTCACACCTTCGAGCTGGAAGCGCAGTAAGTGTAACTAATGCGGAGCTTCCATGTTCCGGAATAC

73  
73  
73  
73  
73  
73  
73  
73  
73  
73  
73  
73  
73  
73  
73  
73  
73  
73

Figure S6 continued.



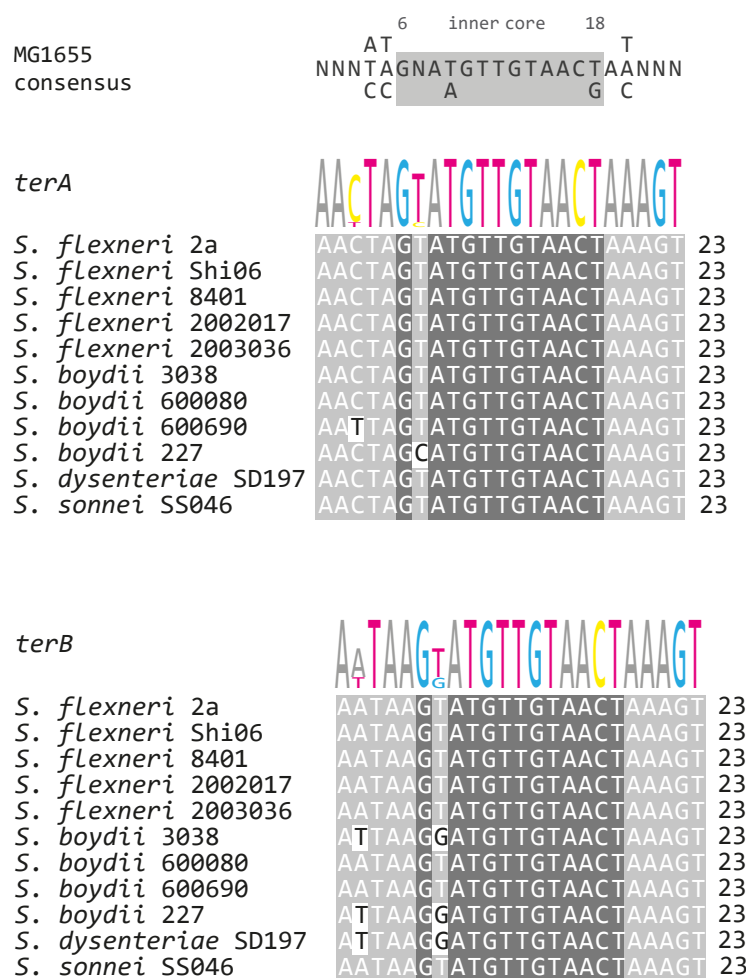

**Figure S7.** Sequence comparison of all *ter* sites across all serotypes from all *Shigella* genomes analysed. The *ter* consensus sequence in MG1655 is shown at the top. Base pairs 1 – 5, 7 and 19 – 23 show a high degree of variability and are shaded in a lighter grey. The highly conserved positions 6 and 8 – 18 are highlighted by a darker grey. Mismatches unlikely to interfere significantly with binding have a white background shading. Mismatches within the core conserved sequence that are likely to interfere with binding are highlighted in red. Relative nucleotide frequencies are shown above as scaled letters. For *S. boydii* 227 we were unable to find a sequence that resembles *terC* (Figure 6) and for this reason the 227 genome is missing in the *terC* analysis.



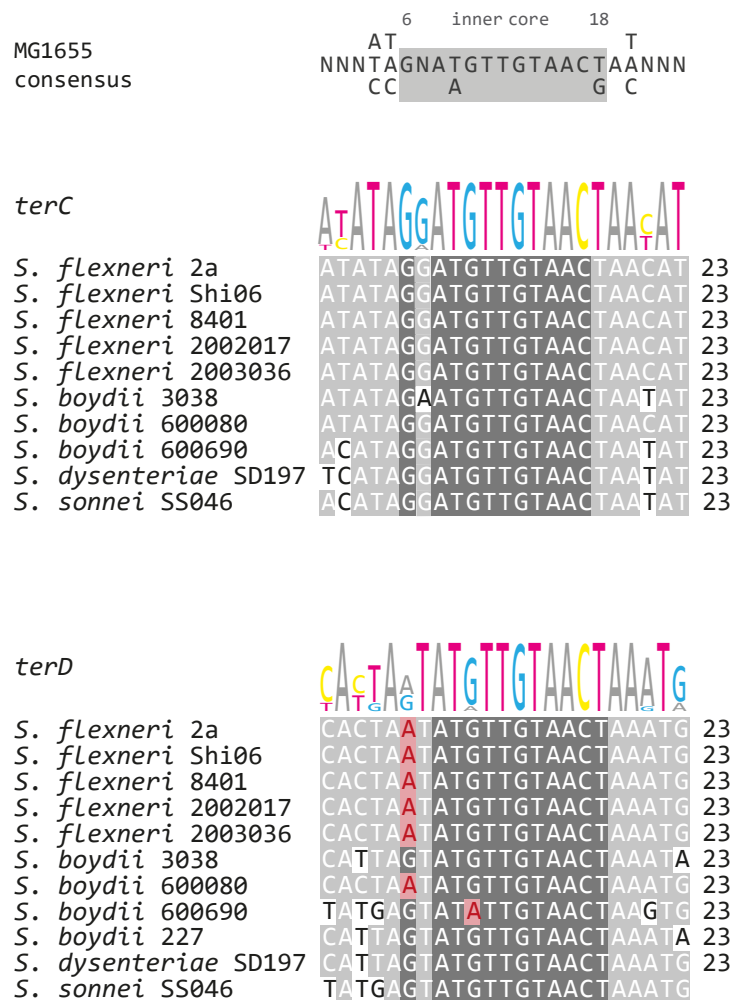

Figure S7 continued.

## SUPPLEMENTARY TABLES

**Table S1.** *Escherichia coli* K12 strains

| Strain number             | Relevant Genotype <sup>a</sup>           | Source                                       |
|---------------------------|------------------------------------------|----------------------------------------------|
| <b>MG1655 derivatives</b> |                                          |                                              |
| MG1655                    | F <sup>-</sup> <i>rph-1</i>              | [1]                                          |
| AM1775                    | $\Delta tus::cat$                        | [2]                                          |
| JD1221                    | $\Delta dif::cat\ dif^{ectopic-}<kan>$   | JD1217 $\times$ P1.JD1219 to Km <sup>r</sup> |
| JD1217                    | $\Delta dif::cat$                        | MG1655 $\times$ P1.JD1212 to Cm <sup>r</sup> |
| JD1212                    | $\Delta dif::cat^b$                      | This study                                   |
| JD1219                    | $\Delta dif::cat\ dif^{ectopic-}<kan>^b$ | This study                                   |

**a** – Only the relevant additional genotype of the derivatives is shown. The abbreviations kan and cat refer to insertions conferring resistance to kanamycin (Km<sup>r</sup>) and chloramphenicol (Cm<sup>r</sup>), respectively. ‘<>’ indicates the use of *frt* sites, where *frt* stands for the 34 bp recognition site of the FLP/*frt* site-directed recombination system. Thus, *<kan>* refers to a kanamycin marker flanked by an *frt* site either side.

**b** – Integration was achieved via the PCR-based one-step chromosomal integration procedure described by Datsenko and Wanner [3]. For *dif<sup>ectopic-kan</sup>* the *dif* site, linked to a kanamycin resistance cassette, was integrated between *ydgA* and *gusC*, just outside of *terB*. Primer sequences of integration constructs are available upon request.

**Table S2.** List of all *E. coli* genomes used in this study, including NCBI nucleotide database access links.

| Organism       | Strain  | Phylogroup | NCBI accession number |
|----------------|---------|------------|-----------------------|
| <i>E. coli</i> | MG1655  | A          | NC_000913.3           |
|                | BW2952  | A          | CP001396              |
|                | REL606  | A          | CP000819.1            |
|                | APEC078 | B1         | NC_020163.1           |
|                | IAI1    | B1         | NC_011741.1           |
|                | 11368   | B1         | NC_013361.1           |
|                | S88     | B2         | NC_011742.1           |
|                | UTI89   | B2         | NC_007946.1           |
|                | E2348   | B2         | NC_011601.1           |
|                | UMN026  | D          | NC_011751.1           |
|                | IAI39   | D          | NC_011750.1           |
|                | SMS-3-5 | D          | NC_010498.1           |
|                | CE10    | D          | NC_017646.1           |
|                | o42     | D          | NZ_CP042934.2         |
|                | TW14359 | E          | NC_013008.1           |
|                | Sakai   | E          | NC_002695.2           |
|                | EDL933  | E          | NC_002655.2           |

**Table S3.** List of all *Shigella*, *Salmonella* and *Klebsiella* genomes used in this study, including NCBI nucleotide database access links.

| Organism          | Strain                                                             | Link        |
|-------------------|--------------------------------------------------------------------|-------------|
| <i>Shigella</i>   | <i>flexneri</i> 2a str. 301                                        | AE005674.2  |
|                   | <i>flexneri</i> Shio6HN006                                         | CP004057.1  |
|                   | <i>flexneri</i> 5 str. 8401                                        | CP000266.1  |
|                   | <i>flexneri</i> 2002017                                            | CP001383.1  |
|                   | <i>flexneri</i> 2003036                                            | CP004056.1  |
|                   | <i>boydii</i> CDC 3083-94                                          | CP001063.1  |
|                   | <i>boydii</i> 600080                                               | CP049606.1  |
|                   | <i>boydii</i> 600690                                               | CP049278.1  |
|                   | <i>boydii</i> Sb227                                                | CP000036.1  |
|                   | <i>dysenteriae</i> Sd197                                           | NC_007606.1 |
|                   | <i>sonnei</i> Sso46                                                | CP000038.1  |
| <i>Salmonella</i> | <i>enterica</i> subsp. <i>enterica</i> , serovar Typhimurium DT104 | HF937208.1  |
|                   | <i>enterica</i> strain FDAARGOS_878                                | NZ_CP065718 |
|                   |                                                                    |             |
| <i>Klebsiella</i> | <i>variicola</i> strain DX120E                                     | CP009274    |
|                   | <i>pneumoniae</i>                                                  | CP003200    |
|                   | subsp. <i>pneumoniae</i> HS11286                                   |             |

**Table S4.** Location of the 10 major *ter* sites in relation to predicted open reading frames within the 5 main *E. coli* phylogenetic groups

| <i>ter</i> site          | MG1655 (A)  | APEC078 (B1) | S88 (B2)               | UMN026 (D)             | TW14359 (E)            |
|--------------------------|-------------|--------------|------------------------|------------------------|------------------------|
| <i>terA</i> <sup>a</sup> | outside ORF | outside ORF  | <i>partial overlap</i> | <i>partial overlap</i> | <i>partial overlap</i> |
| <i>terB</i>              | outside ORF | outside ORF  | outside ORF            | outside ORF            | outside ORF            |
| <i>terC</i>              | outside ORF | outside ORF  | outside ORF            | outside ORF            | outside ORF            |
| <i>terD</i>              | outside ORF | outside ORF  | outside ORF            | outside ORF            | outside ORF            |
| <i>terE</i>              | outside ORF | outside ORF  | outside ORF            | outside ORF            | outside ORF            |
| <i>terF</i>              | inside ORF  | inside ORF   | inside ORF             | inside ORF             | inside ORF             |
| <i>terG</i>              | inside ORF  | inside ORF   | inside ORF             | inside ORF             | inside ORF             |
| <i>terH</i>              | inside ORF  | inside ORF   | inside ORF             | inside ORF             | inside ORF             |
| <i>terI</i>              | inside ORF  | inside ORF   | inside ORF             | inside ORF             | inside ORF             |
| <i>terJ</i>              | inside ORF  | inside ORF   | inside ORF             | inside ORF             | inside ORF             |

**a** – the innermost *ter* sites are highlighted in red, while outer *ter* sites are in dark grey.

**Table S5.** Doubling times of *E. coli* strains with the chromosome dimer resolution site *dif* in its native or an ectopic location.

| Strain Background            | Doubling Time [min] | SD    |
|------------------------------|---------------------|-------|
| MG1655                       | 21.8                | ± 1.3 |
| <i>dif<sup>ectopic</sup></i> | 26.7 <sup>a</sup>   | ± 3.9 |

**a** – the doubling time of the *dif<sup>ectopic</sup>* derivative is significantly different to the doubling time of wild type cells according to a Wilcoxon signed-rank test ( $p = 0.05$ ).

## SUPPLEMENTARY REFERENCES

- [1] Bachmann, B J. Derivations and Genotypes of Some Mutant Derivatives of *Escherichia coli* K-12. *Escherichia Coli Salmonella Cell. Mol. Biol. Second Edition*, ASM Press; 1996.
- [2] Rudolph CJ, Upton AL, Stockum A, Nieduszynski CA, Lloyd RG. Avoiding chromosome pathology when replication forks collide. *Nature* 2013;500:608–11. <https://doi.org/10.1038/nature12312>.
- [3] Datsenko KA, Wanner BL. One-step inactivation of chromosomal genes in *Escherichia coli* K-12 using PCR products. *Proc Natl Acad Sci U S A* 2000;97:6640–5. <https://doi.org/10.1073/pnas.120163297>.
- [4] Castillo F, Benmohamed A, Szatmari G. Xer Site Specific Recombination: Double and Single Recombinase Systems. *Front Microbiol* 2017;8:453. <https://doi.org/10.3389/fmicb.2017.00453>.
